# Supplementary material
Source: HighWire-hosted journal article supplement (https://learnmem.cshlp.org/content/suppl/2023/07/11/30.5-6.110)
Supplement: Supplemental_Material.docx [file Supplemental_Material.docx]

Supplementary Materials

Pattern separation of fear extinction memory

Laing & Dunsmoor, 2023

Supplementary Methods

***Participants.*** Forty-five adult volunteers were recruited for the two-day within-subjects study from the University of Texas at Austin, earning course credit for participation. Upon arrival, participants provided written informed consent and confirmed that they had no current major illnesses, including psychiatric or neurological disorders, fluency in English, normal or corrected-to-normal vision, and no hearing impairments. On each day, participants underwent experimental procedures to assess emotional learning and memory (explained below), and completed self-report measures of clinically-relevant domains, including the short-form Depression, Anxiety, and Stress Scale (DASS-21, (Lovibond & Lovibond, 1995) and the inventory of depression and anxiety symptoms (IDAS-II, (Watson et al., 2007). Several exclusions were made; one participant failed to complete day 1, another failed to attend day 2, another experienced technical issues during both sessions, and another rated the shock as zero intensity following day 1. This resulted in a final sample of *N* = 41 (34 female, mean age = 18.68 ± 0.90, age range = 18-21). The study was approved by the University of Texas at Austin Institutional Review Board (IRB: 2020020157-MOD08).

***Category conditioning and fear extinction (day 1).*** Our experimental design followed from previous studies, by using a hybrid of Pavlovian category conditioning and episodic memory assessment (Starita et al., 2019). Day 1 featured a category conditioning paradigm (Figure 1.) conducted across three phases: pre-conditioning (Pre-Con), threat acquisition (ACQ), and extinction learning (EXT). Conditioned stimuli (CS) were images from two superordinate categories, animals and tools, displayed on a white background. Throughout day 1’s procedure, each CS trial featured a unique category exemplar, such that items were never repeated. Each phase was separated by 2-5min break and the presentation order of stimulus category types and images were pseudorandomized, such that there were not three trials of a category (e.g., tool items) in a row. The two categories were assigned as CS+ (50% reinforcement rate) or CS- and counterbalanced between subjects (approximately 50% subjects CS+ = animals, 50% CS+ = tools, Fig.1.). On each trial, the category CS item appeared in the center of the screen with a duration of 4.5s. Brief electric shocks (50ms) served as the unconditioned stimulus (US), and was delivered via electrodes attached to participants’ right wrist. In-between the pre-conditioning and threat acquisition phases, participants underwent a shock calibration procedure, where the magnitude of shock was adjusted to a level judged as ‘*highly annoying and unpleasant, but not painful*’. For reinforced items, shock-delivery coincided with stimulus offset, and had a 50ms duration. Inter-trial intervals were randomly jittered between 5-7 (mean = 6s).

Each of day 1’s phases (Pre-Con, ACQ, EXT), 24/24 unique animal/tool images were presented (48 per phase, 144 total). The individual unique items appearing in these phases were designed to be 50% ‘Old-Targets’ which would be repeated as exact form on day 2, while the other 50% were ‘Similar pairs’, wherein items appearing on day 2 would resemble, yet be distinct from, the day 1 items (see below for further detail). In phase 1 (Pre-Con), skin conductance electrodes (but not shock electrodes) were attached, and participants were instructed that no shocks were to occur in this phase. Participants were asked to judge the category of each item by pressing ‘1’ (animal) or ‘2’ (tool) on the keyboard provided (2AFC). In-between phase 1 and 2, shock electrodes were attached, and the shock calibration procedure was conducted. During threat acquisition (ACQ, phase 2) shocks were delivered following 50% of the CS+ images (12 shocked, 12 unpaired), while the CS- category was never followed by shock, and during extinction learning (EXT, phase 3), shock and SCR electrodes remained attached, but no shocks were delivered. Threat-expectancy ratings were measured for each trial of the ACQ and EXT phases, participants having been instructed to rate each item between 1-3 corresponding to their expectation that a shock would immediately follow the image (3AFC ratings; 1 = YES, 2 = UNSURE, 3 = NO). For all day 1 phases, ratings options remained visually presented onscreen throughout the phase, including the inter-trial intervals, so as not to distract from the presentation of the CS.

***Episodic memory and source memory tasks (day 2).*** We designed a specialized iteration of the ‘behavioral pattern separation (BPS) task’, which is also known as the ‘mnemonic similarity task’ (MST) (Stark et al., 2019) in order to assess episodic memory for threat and extinction learning. BPS/MST tasks typically feature a battery of items that are either ‘Targets’ (exact repeats of items from encoding), ‘Lures’ (similar, but not identical to, items from encoding), or ‘Foils’ (novel items that never appeared during encoding). In our version of the task these conditions were designed to include equivalent distributions in terms of number of items, between the memory conditions (Targets, Lures, Foils), the phases in which the items had been encoded on day 1 (Pre-Con, ACQ, EXT), and the categories that the items belonged to (animals/tools, i.e., CS+/CS-). There were 216 items total (108/108, animals/tools), with items equally distributed across the mnemonic conditions, which hereafter we refer to as: OLD-Targets, SIMILAR-Lures, and NEW-Foils. There was a total of 72 Old-Targets (36/36 animals/tools), 72 Similar-Lures (36/36 animals/tools), and 72 New-Foil category items (36/36 animals/tools). Old-Targets and Similar-Lures had equal distribution of items corresponding to the three encoding phases on day 1: pre-conditioning (Pre-Con), acquisition (ACQ), and extinction (EXT) (24/24 Old and Similar for each phase). As such, within each phase, there were 12 CS+ and 12 CS- items of each conditioning (Old-Target or Similar-Lure). Due to partial (50%) aversive reinforcement, CS+ items from the ACQ phase were also distributed to have an equal number of shocked/unpaired Old and Similar (6 shocked CS+/6 unpaired CS+ per condition). For this task, participants made 3AFC ratings, corresponding to ‘OLD’ (1), ‘SIMILAR’ (2), or ‘NEW’ (3) for each item. Items appeared in the center of the screen, on a white background. Unlike day 1’s procedure, the memory task was self-paced, with items terminating from the screen after each response was made, with randomly jittered inter-trial intervals between 2-3s (mean = 2.5s). The test was split into two separate modules to allow a brief rest period (<1min) given the high number of trials. Before the task commenced, participants were given brief instructions to introduce what each ratings response referred to in the context of the task, with an example featuring items unrelated to animal or tool categories.

Following the behavioral pattern separation task, participants completed a combined test of ‘temporal source attribution’ and stimulus typicality. This task presented all of the items that had appeared on day 1 (144), without presenting any foil or lure items. Two rating responses were made for each stimulus. First, participants gave a 3AFC rating for source attribution – in this instance judging whether they saw an item during phase 1, 2, or 3 of day 1’s session. They were not told that these phases had names (e.g., acquisition, extinction), but simply reminded that three separate phases had occurred, and prompted as to what each one involved (e.g.; “*phase 1 was at the beginning when you classified each item as being an animal or a tool…*”). Typicality judgements were assessed to observe whether the typicality of category items influenced conditioning or memory performance. Prior to the task, participants were instructed on how to rate typicality given an example based on unrelated categories (not tools or animals): *“For example, an apple is a typical fruit, it is representative of the entire fruit category. On the other hand, a dragon fruit is not a typical fruit, at least in American grocery stores”*. Immediately following source attribution ratings, participants judged typicality for every item using a seven-point scale (1 = not at all typical, 7 = very typical). The task was self-paced, with randomly jittered 500ms-800ms inter-trial intervals between each image.

***Conditioned Threat Responses.*** Physiological conditioning during the experimental phases of day 1 was assessed via electrodermal activity (EDA), acquired through electrodes attached to participants’ left palms, with conductive gel (0.5% saline) applied to the skin surface. EDA signal was continuously sampled at 200Hz throughout the experimental procedures of day 1 using snap electrodes (BIOPAC EL509) routed through the BIOPAC MP150 System (Goleta, CA). Trial-wise skin conductance (SCR) data were considered valid conditioned responses if they were > 0.02 *µS* (microsiemens), occurred between 0.5-5s following CS onset, and lasted a maximum of 5s. SCRs were preprocessed using an automated script in MATLAB (Green et al., 2014). Data were square-root transformed prior to analyses so as to normalize distributions. Trial-wise SCR data were defined as outliers and removed with interpolation if exceeding three times the standard deviation. Threat-expectancy ratings were made on a 3AFC scale (1 = YES, 2 = UNSURE, 3 = NO), which were transformed to 1, 0.5, and 0 respectively, to reflect higher values as greater threat expectancy.

***Statistical Analyses.*** Behavioral measures (i.e., threat-expectancy and SCRs) of threat conditioning and extinction (day 1) were analyzed via 2-way repeated measures ANOVA, with analyses excluding first trial SCRs so as to avoid novelty and orienting artefacts (Maltzman, 1977; Öhman, 1982). Mnemonic similarity task and source memory responses (day 2) were analyzed via 2-way and 3-way repeated measures ANOVA respectively, all including Greenhouse-Geisser correction. Partial eta-squared (*η2p*) and Cohen’s *d* served as effect sizes (for main effects and post hoc tests respectively), and Bonferroni correction are reported for *p*-values regarding analyses that involved multiple comparisons. Two-tailed one-sample t-tests were applied to the measures calculated for episodic memory to assess whether scores significantly differed from zero (i.e., the intended memory effect occurred or not, see Supplementary Materials). Individual differences analyses were conducted via zero-order Pearson’s correlations, with p-values and Bayes Factors (BF10) reported, followed by multiple linear regression models. All statistical analyses were conducted using JASP open source software (JASP-Team, 2021). Data is available on the Open Science Framework (https://osf.io/h4kua/).

Supplementary Results

***Scoring episodic memory performance.*** Memory judgements (old, similar, new) were scored as proportional responses (ranging 0-1). Main measures of interest were pattern separation (PS), pattern completion (PC), and recognition memory (REC), as well as the lure discrimination index (LDI). After the scores for these measures were calculated (see results, main report), a series of two-tailed one sample t-tests were used to validate whether scores for each phase and CS-type significantly differed from zero (i.e., no effect). Most scores were significant, with p-values ranging *p* = 0.02 to *p* < 0.001, and effect sizes from Cohen’s *d* = 0.60 to *d* = 1.90. Scores were not significant for the following measures: LDI scores for ACQ (CS+ and CS-) and EXT (CS+) items, and pattern separation scores for Pre-Con (CS-) and ACQ (CS+) items.

| **One-sample T-tests** |  |  | |  | |  | **95% CI for Cohen's *d*** | |
| --- | --- | --- | --- | --- | --- | --- | --- | --- |
| **Memory scores** | ***t*** | | ***p*** | | **Cohen's *d*** | | **Lower** | **Upper** |
| LDI: Pre-Con CS+ | 3.119 | | 0.003 | | 0.487 | | 0.16 | 0.808 |
| LDI: Pre-Con CS- | 4.41 | | < .001 | | 0.689 | | 0.344 | 1.026 |
| LDI: ACQ CS+ | 1.912 | | **0.063** | | 0.299 | | -0.016 | 0.61 |
| LDI: ACQ CS- | 1.491 | | **0.144** | | 0.233 | | -0.079 | 0.542 |
| LDI: EXT CS+ | 0.735 | | **0.467** | | 0.115 | | -0.193 | 0.421 |
| LDI: EXT CS- | 3.449 | | 0.001 | | 0.539 | | 0.208 | 0.864 |
| REC: Pre-Con CS+ | 12.3 | | < .001 | | 1.921 | | 1.397 | 2.436 |
| REC: Pre-Con CS- | 13.977 | | < .001 | | 2.183 | | 1.612 | 2.745 |
| REC: ACQ CS+ | 14.146 | | < .001 | | 2.209 | | 1.634 | 2.776 |
| REC: ACQ_CS- | 11.152 | | < .001 | | 1.742 | | 1.249 | 2.225 |
| REC: EXT_CS+ | 10.654 | | < .001 | | 1.664 | | 1.184 | 2.134 |
| REC: EXT_CS- | 8.508 | | < .001 | | 1.329 | | 0.902 | 1.746 |
| P.Comp: Pre-Con CS+ | 6.325 | | < .001 | | 0.988 | | 0.609 | 1.358 |
| P.Comp: Pre-Con CS- | 6.179 | | < .001 | | 0.965 | | 0.589 | 1.333 |
| P.Comp: ACQ CS+ | 8.652 | | < .001 | | 1.351 | | 0.922 | 1.772 |
| P.Comp: ACQ CS- | 5.568 | | < .001 | | 0.87 | | 0.505 | 1.226 |
| P.Comp: EXT CS+ | 6.434 | | < .001 | | 1.005 | | 0.624 | 1.377 |
| P.Comp: EXT CS- | 5.701 | | < .001 | | 0.89 | | 0.524 | 1.249 |
| P.Sep: Pre-Con CS+ | 5.413 | | < .001 | | 0.845 | | 0.484 | 1.199 |
| P.Sep: Pre-Con CS- | 0.786 | | **0.437** | | 0.123 | | -0.185 | 0.429 |
| P.Sep: ACQ CS+ | 1.249 | | **0.219** | | 0.195 | | -0.115 | 0.503 |
| P.Sep: ACQ CS- | 6.429 | | < .001 | | 1.004 | | 0.623 | 1.376 |
| P.Sep: EXT CS+ | 6.597 | | < .001 | | 1.03 | | 0.646 | 1.406 |
| P.Sep: EXT CS- | 4.154 | | < .001 | | 0.649 | | 0.308 | 0.983 |

Note. Non-significant in bold text. ‘LDI’ = lure discrimination index. ‘REC’ = recognition memory. ‘P.Comp’ = pattern completion. ‘P.Sep’ = pattern separation. All t-test results are two-tailed.

***Emotional learning and lure discrimination index (LDI).*** Our main results centered on REC, PS, and PC scores. The ‘lure discrimination index’ (LDI) was not featured, since in total, participants did not use the option of ‘similar’ responses at test in equivalent rates as ‘old’ or ‘new’. Here, we report a repeated-measures ANOVA of lure discrimination scores. LDI scores reflect the discrimination of similar-lures rated as being ‘similar’, minus the probability of appraising new-foils as similar (*p*(similar | lure) – *p*(similar | foil)) (Stark et al., 2019). One-sample t-tests showed that LDI scores were not significantly different from zero (i.e., no effect) when calculated for CS+ and CS- items from the ACQ phase, or for CS+ items from the EXT phase. Overall, scores for LDI appeared low. LDI scores showed main effect of phases (Pre-Con, ACQ, EXT; *F*1, 40 *=* 7.03, *p* = 0.003, *η2p*= 0.036), but no effect of CS-type (*p* = 0.52) or stimulus x phase interaction (*p* = 0.16). Post hoc tests showed that the effect of phase was due to higher LDI scores for stimuli from the pre-conditioning phase, which were significantly greater than those for ACQ (Pre-Con > ACQ; *M* = 0.07, *d* = 0.49, *p* = 0.007, 95%CI [0.02, 0.13]) and EXT (Pre-Con > EXT; *M* = 0.08, *d* = 0.52, *p* = 0.004, 95%CI [0.02, 0.13]) phases. This was further specifically due to CS- items from the pre-conditioning phase, which had greater LDI than CS- items from ACQ (Pre-Con CS- > ACQ CS-; *M* = 0.11, *p* = 0.015, 95%CI [0.12, 0.20]) and CS+ items from EXT (Pre-Con CS- > EXT CS+; *M* = 0.119, *p* = 0.04, 95%CI [0.00, 0.24]). CS+ items from the pre-conditioning phase did not differ from any other condition.


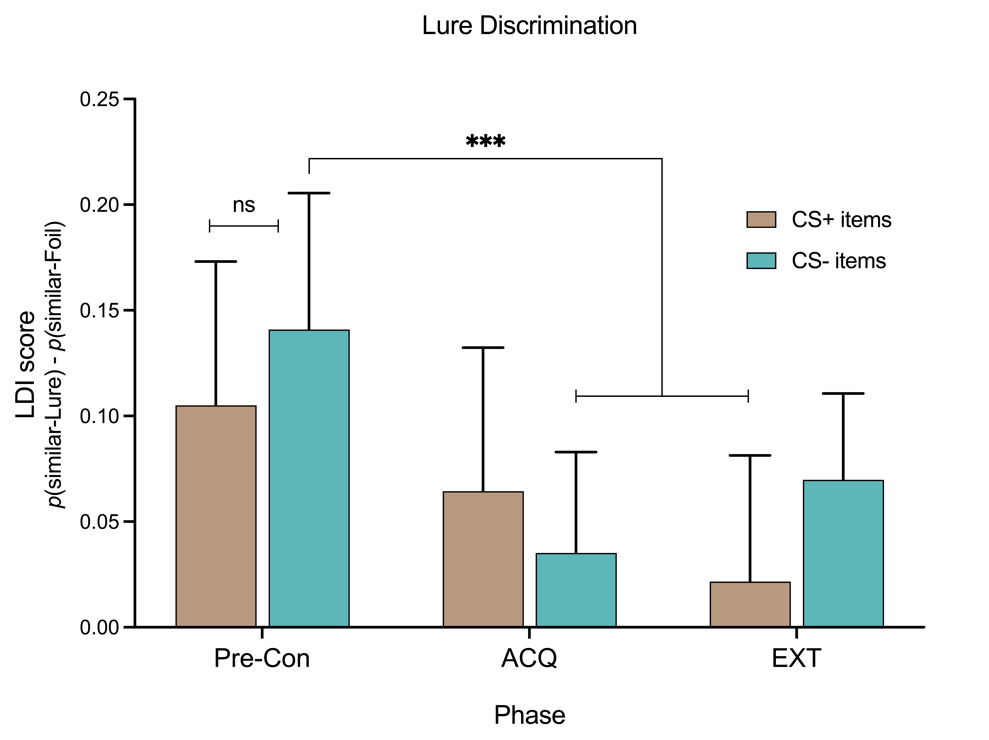


**Supplementary Figure 1.** LDI scores for CS+ and CS- category items between phases. Performance on lure discrimination was small but seemingly intact for CS items from the pre-conditioning phase, where no emotional learning had occurred. However, scores were significantly reduced for both fear-conditioned and extinction items, suggesting that identifying similar items as ‘similar’ is disrupted by emotional learning, and fails to differentiate threat and safe information.

**References**

Green, S. R., Kragel, P. A., Fecteau, M. E., & LaBar, K. S. (2014). Development and validation of an unsupervised scoring system (Autonomate) for skin conductance response analysis. *International Journal of Psychophysiology*, *91*(3), 186-193. <https://doi.org/https://doi.org/10.1016/j.ijpsycho.2013.10.015>

JASP-Team. (2021). JASP (version 0.14.1)[computer software]. [*https://jasp-stats.org*](https://jasp-stats.org).

Maltzman, I. (1977). Orienting in classical conditioning and generalization of the galvanic skin response to words: An overview. *Journal of Experimental Psychology: General*, *106*(2), 111.

Öhman, A. (1982). *The orienting response during Pavlovian conditioning*. Department of Psychology, University of Uppsala.

Stark, S. M., Kirwan, C. B., & Stark, C. E. L. (2019). Mnemonic similarity task: A tool for assessing hippocampal integrity. *Trends in cognitive sciences*, *23*(11), 938-951.
